# Supplementary material for: Experimental design approaches to optimize ultrasound-assisted simultaneous-silylation dispersive liquid–liquid microextraction for the rapid determination of parabens in water samples
Source: Royal Society of Chemistry journal article supplement (doi:10.1039/d1ra04195a), 2021-01-01
Supplement: d1ra04195a1.pdf [file d1ra04195a1.pdf]

## **Supplementary Material**

**Experimental design approaches to optimize ultrasound-assisted simultaneous-silylation dispersive liquid-liquid microextraction for the rapid determination of parabens in surface water samples**

**Chi-Zhong Hsieh, Wu-Hsun Chung<sup>a,b</sup>, Wang-Hsien Ding<sup>a,\*</sup>**

**<sup>a</sup> Department of Chemistry, National Central University,  
Chung-Li 320, Taiwan**

**<sup>b</sup> Department of Chemical Engineering, Army Academy ROC,  
Chung-Li 320, Taiwan**

### ***Reagents, chemicals and standards***

Sigma-Aldrich (St. Louis, MO, USA) and Merck (Darmstadt, Germany) supplied all chemicals and solvents (highest available purity) that were used in this study. Analytical standards (purity greater than 98%), viz., methyl-paraben (MeP), ethyl-paraben (EtP), propyl-paraben (PrP), and butyl-paraben (BuP) were obtained from Alfa Aesar (Lancashire, UK), and were used for the evaluation and validation of the developed method. Their name, structures, chemical and physical properties are listed in Table S1. *p*-Terphenyl- $d_{14}$  (purity  $\geq 98\%$ , used as an internal standard), *N*-Methyl-(*tert*-butyldimethylsilyl)-trifluoroacetamide with 1% *tert*-butyldimethylchlorosilane (MTBSTFA+1% t-BDMCS, or simplified as MTBSTFA in this study) and *N,O*-bis(trimethylsilyl)-trifluoroacetamide with 1% trimethylchlorosilane (BSTFA+1% TMCS, or simplified as BSTFA in this study) were obtained from Sigma-Aldrich. Stock solutions of each analyte (1.0 mg/mL) were prepared in methanol. Mixtures of the analytes for working standard preparations and sample fortification were prepared in methanol. All stock solutions and mixtures were stored in the dark at 4 °C. Deionized water was further purified using a Millipore water purification system (Billerica, MA, USA).

**Table S1.** Name (abbreviation), chemical structure, physical and chemical properties of four parabens used for the method development and validation.

| <b>Name<br/>(Abbreviation):</b> | <b>Structure</b>                                                                    | <b>MW<br/>(g/mol)</b> | <b>pK<sub>a</sub></b> | <b>LogK<sub>ow</sub></b> | <b>Vapor<br/>pressure<br/>mm Hg<br/>(25°C)</b> |
|---------------------------------|-------------------------------------------------------------------------------------|-----------------------|-----------------------|--------------------------|------------------------------------------------|
| <b>Methyl-paraben<br/>(MeP)</b> | 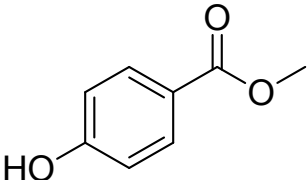   | <b>152.1</b>          | 8.5                   | 1.96                     | $2.37 \times 10^{-4}$                          |
| <b>Ethyl-paraben<br/>(EtP)</b>  |    | <b>166.2</b>          | 8.5                   | 2.47                     | $9.29 \times 10^{-5}$                          |
| <b>Propyl-paraben<br/>(PrP)</b> |   | <b>180.2</b>          | 7.91                  | 3.04                     | $3.07 \times 10^{-4}$                          |
| <b>Butyl-paraben<br/>(BuP)</b>  |  | <b>194.2</b>          | 8.47                  | 3.57                     | $2.51 \times 10^{-4}$                          |

**Table S2.** Analysis of variance (ANOVA) for the Factorial Multilevel Categorical Design

| Source             | Sum of Squares         | df | Mean Square            | F Value | p-value<br>Prob > F |
|--------------------|------------------------|----|------------------------|---------|---------------------|
| Model              | 7.076×10 <sup>14</sup> | 7  | 1.011×10 <sup>14</sup> | 26.12   | <0.0001*            |
| A-Extractant       | 2.725×10 <sup>14</sup> | 2  | 1.362×10 <sup>14</sup> | 35.21   | <0.0001*            |
| B-Dispersant       | 3.704×10 <sup>14</sup> | 2  | 1.852×10 <sup>14</sup> | 47.87   | <0.0001*            |
| C-Silylating agent | 4.481×10 <sup>13</sup> | 1  | 4.481×10 <sup>13</sup> | 11.58   | 0.0067*             |
| BC                 | 1.982×10 <sup>13</sup> | 2  | 9.912×10 <sup>12</sup> | 2.56    | 0.1264              |

**Table S3.** Analysis of variance (ANOVA) for the Box-Behnken Design.

| source                               | Sum of squares         | df | Mean square            | F Value | p-value<br>Prob > F |
|--------------------------------------|------------------------|----|------------------------|---------|---------------------|
| <b>Model</b>                         | 2.532×10 <sup>14</sup> | 9  | 2.813×10 <sup>13</sup> | 11.95   | 0.0069*             |
| <b>A-C<sub>2</sub>Cl<sub>4</sub></b> | 5.064×10 <sup>13</sup> | 1  | 5.064×10 <sup>13</sup> | 21.50   | 0.0056*             |
| <b>B-Acetone</b>                     | 1.524×10 <sup>13</sup> | 1  | 1.524×10 <sup>13</sup> | 6.47    | 0.0483*             |
| <b>C-Salt added</b>                  | 8.460×10 <sup>12</sup> | 1  | 8.460×10 <sup>12</sup> | 3.59    | 0.1165              |
| <b>AB</b>                            | 6.317×10 <sup>12</sup> | 1  | 6.317×10 <sup>12</sup> | 2.68    | 0.1624              |
| <b>AC</b>                            | 3.650×10 <sup>10</sup> | 1  | 3.650×10 <sup>10</sup> | 0.015   | 0.9058              |
| <b>BC</b>                            | 1.075×10 <sup>13</sup> | 1  | 1.075×10 <sup>13</sup> | 4.56    | 0.0857              |
| <b>A<sup>2</sup></b>                 | 5.958×10 <sup>13</sup> | 1  | 5.958×10 <sup>13</sup> | 25.30   | 0.0040              |
| <b>B<sup>2</sup></b>                 | 6.463×10 <sup>13</sup> | 1  | 6.463×10 <sup>13</sup> | 27.45   | 0.0034              |
| <b>C<sup>2</sup></b>                 | 3.137×10 <sup>13</sup> | 1  | 3.137×10 <sup>13</sup> | 13.32   | 0.0187              |
| <b>Lack-of-fit</b>                   | 1.101×10 <sup>13</sup> | 3  | 3.669×10 <sup>12</sup> | 9.57    | 0.0960              |

\*Significant

The *F*-value for “Lack-of-Fit” was insignificant (at the 95% confidence level) which confirmed that the model fit the response variables with a near-perfect prediction.

**Table S4.** Spiked recoveries (%) of individual target analyte for each experimental condition of Box-Behnken Design

| Run | C <sub>2</sub> Cl <sub>4</sub><br>(μL) (A) | Acetone<br>(μL) (B) | NaCl<br>(%) (C) | (%) |     |     |     |
|-----|--------------------------------------------|---------------------|-----------------|-----|-----|-----|-----|
|     |                                            |                     |                 | MeP | EtP | PrP | BuP |
| 1   | 15                                         | 800                 | 5               | 72  | 68  | 65  | 69  |
| 2   | 20                                         | 600                 | 5               | 97  | 92  | 93  | 93  |
| 3   | 15                                         | 600                 | 10              | 72  | 71  | 78  | 79  |
| 4   | 15                                         | 600                 | 1               | 80  | 81  | 78  | 79  |
| 5   | 30                                         | 600                 | 1               | 55  | 52  | 53  | 61  |
| 6   | 20                                         | 800                 | 1               | 72  | 69  | 66  | 71  |
| 7   | 20                                         | 400                 | 10              | 55  | 53  | 61  | 51  |
| 8   | 20                                         | 600                 | 5               | 92  | 86  | 88  | 94  |
| 9   | 30                                         | 800                 | 5               | 68  | 65  | 65  | 64  |
| 10  | 20                                         | 600                 | 5               | 93  | 95  | 91  | 95  |
| 11  | 30                                         | 400                 | 5               | 45  | 43  | 51  | 49  |
| 12  | 15                                         | 400                 | 5               | 69  | 65  | 62  | 63  |
| 13  | 20                                         | 800                 | 10              | 72  | 69  | 71  | 70  |
| 14  | 20                                         | 400                 | 1               | 78  | 72  | 78  | 79  |
| 15  | 30                                         | 600                 | 10              | 52  | 49  | 55  | 50  |

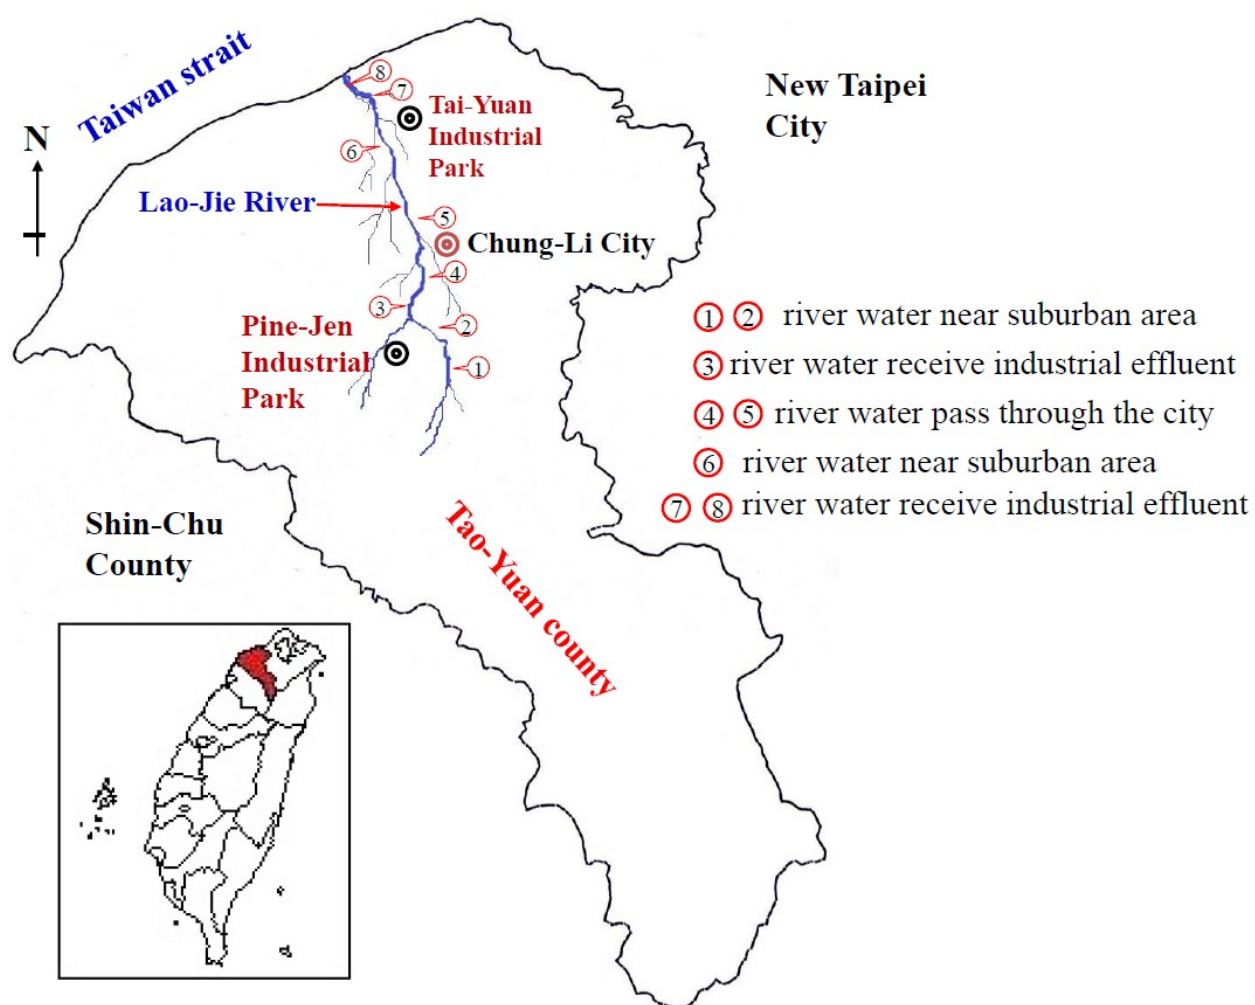

**Figure S1.** Sampling sites and locations at the Lao-Jie River.

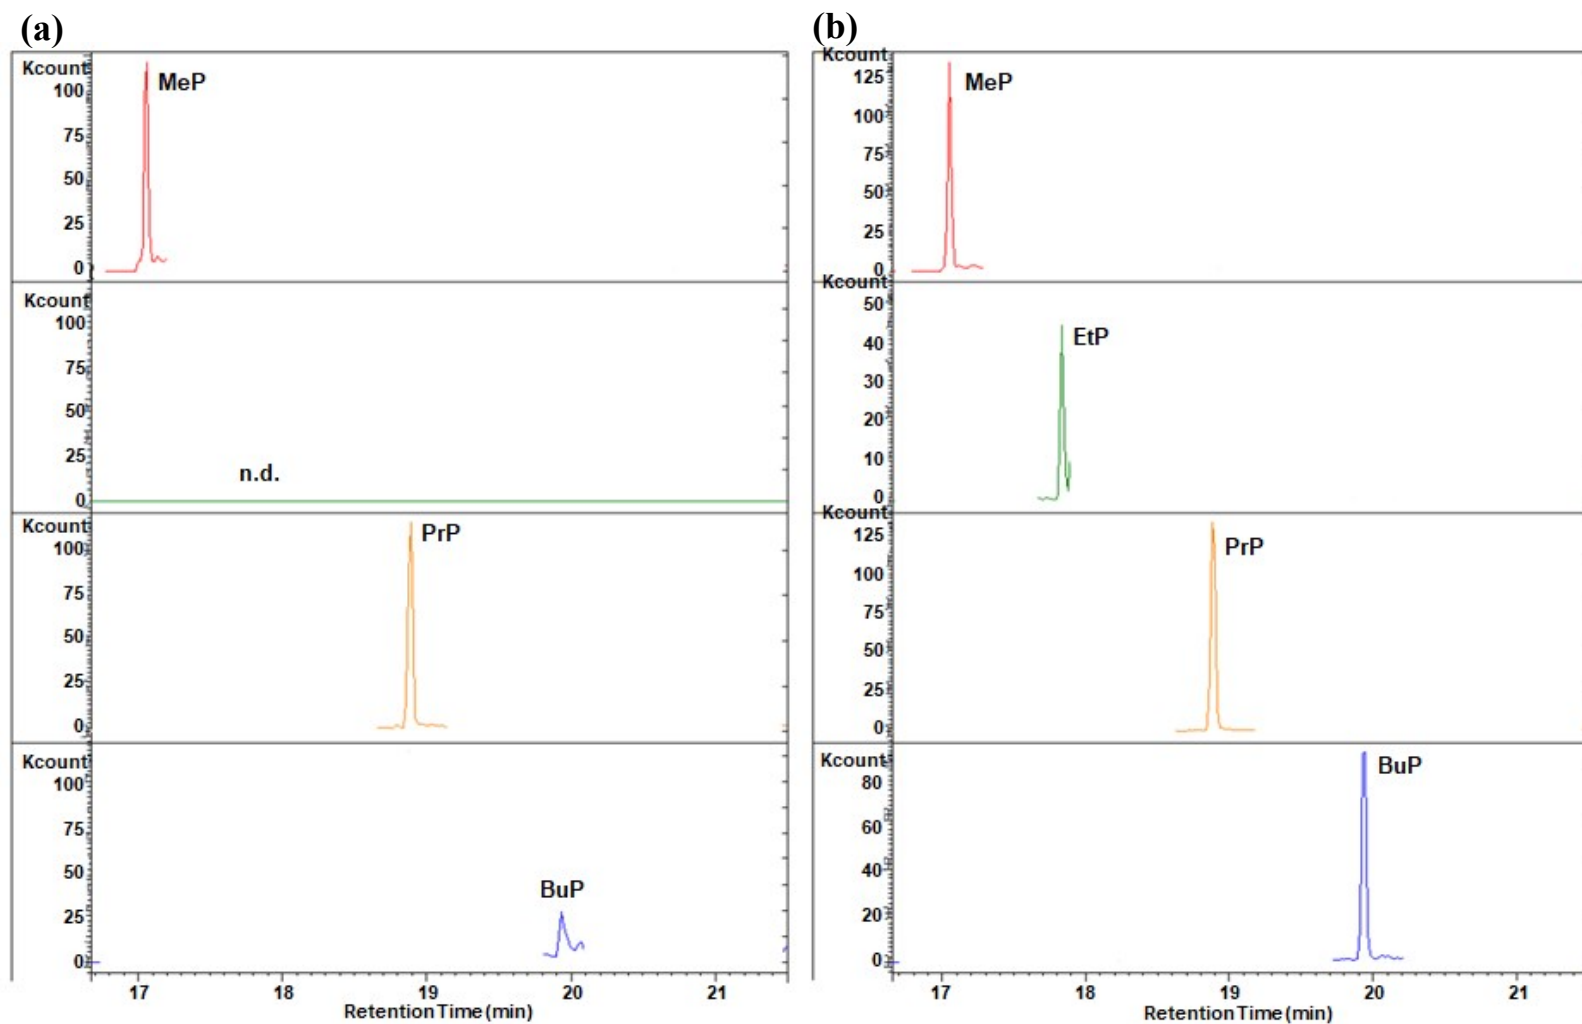

**Figure S2.** GC-MS/MS chromatograms for (a) non-spiked, and (b) spiked “River-5” water samples (final spiked concentration 100 ng L<sup>-1</sup>). n.d.: not detected.
